# Supplementary material for: Accramycin A, A New Aromatic Polyketide, from the Soil Bacterium, Streptomyces sp. MA37
Source: PubMed Central journal article supplement (PMC6767120; doi:10.3390/molecules24183384), 2019-09-17
Supplement: molecules-24-03384-s001.pdf [file molecules-24-03384-s001.pdf]

## SUPPLEMENTARY INFORMATION

### Accramycin A, a new aromatic polyketide, from the soil bacterium, *Streptomyces sp.* MA37

MA11 #1483 RT: 21.41 AV: 1 NL: 3.52E6  
F: FTMS + p ESI Full ms [150.00-2000.00]

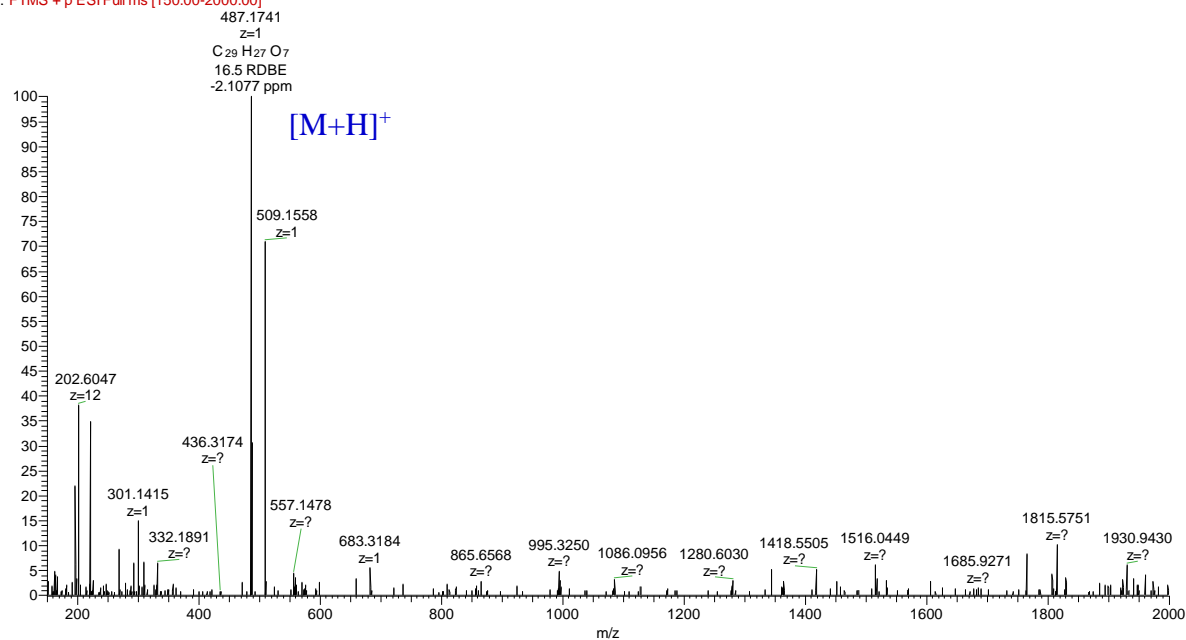

Figure S1. HR ESIMS of accramycin A

MA15 #1490-1493 RT: 21.43-21.48 AV: 2 NL: 2.00E6  
T: Average spectrum MS2 487.17 (1490-1493)

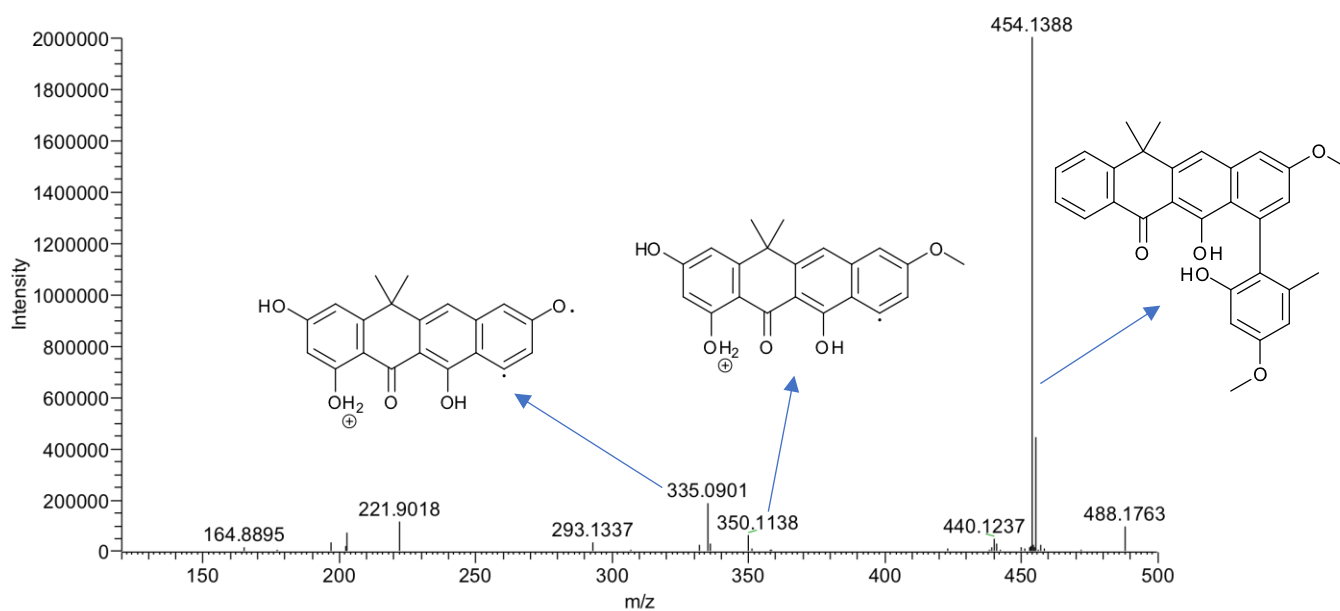

Figure S2. MS/MS fragmentation of accramycin A

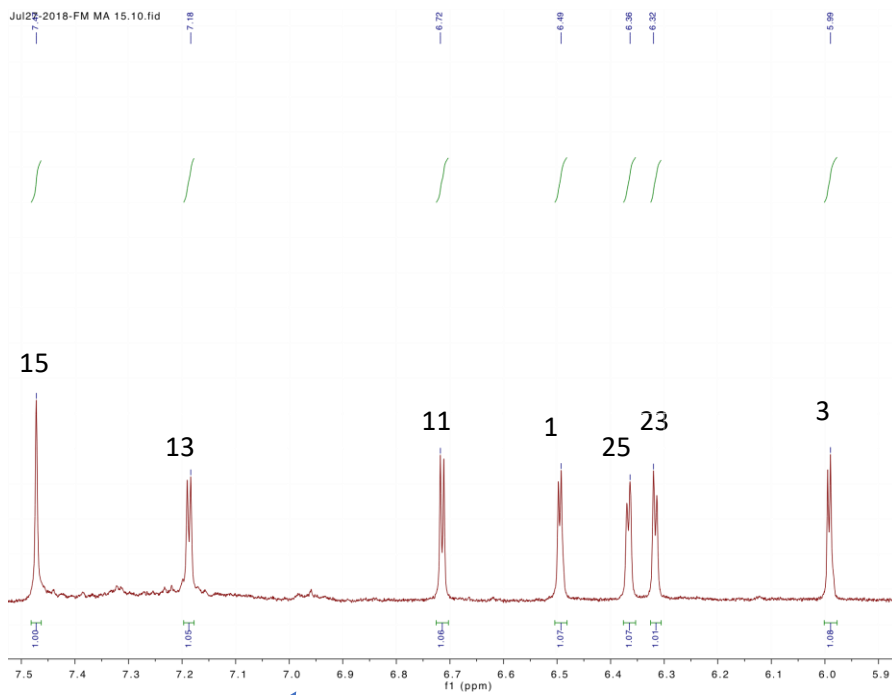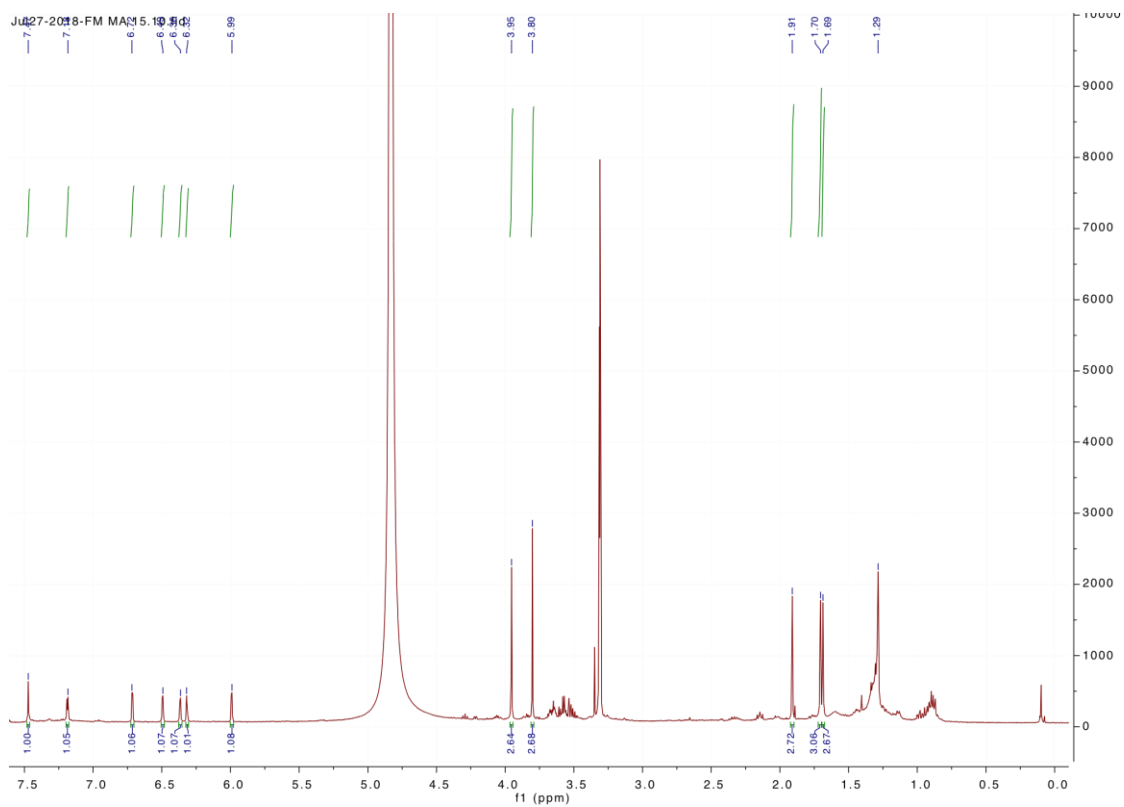

Figure S3.  $^1\text{H}$ -NMR spectrum of accramycin A in  $\text{CD}_3\text{OD}$  at 600 MHz

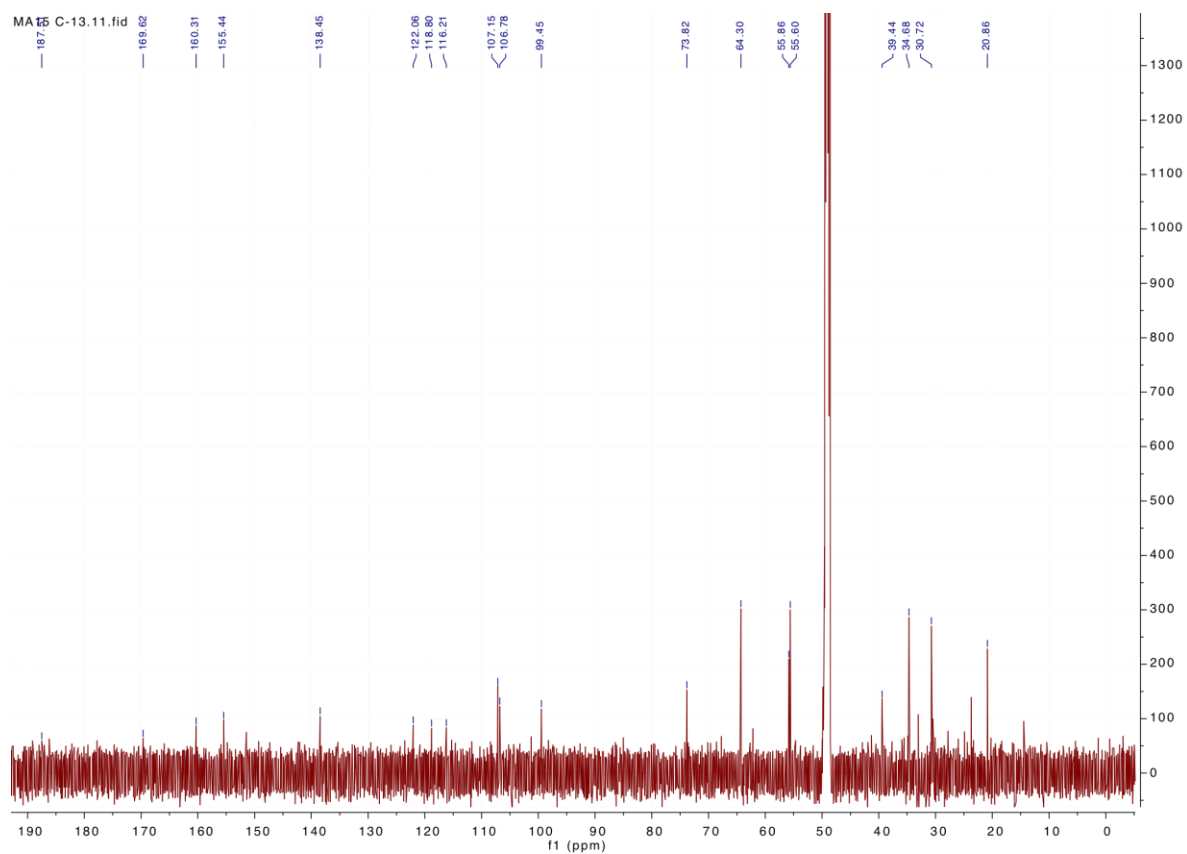

Figure S4.  $^{13}\text{C}$  NMR spectrum of accramycin A in  $\text{CD}_3\text{OD}$  at 600 MHz

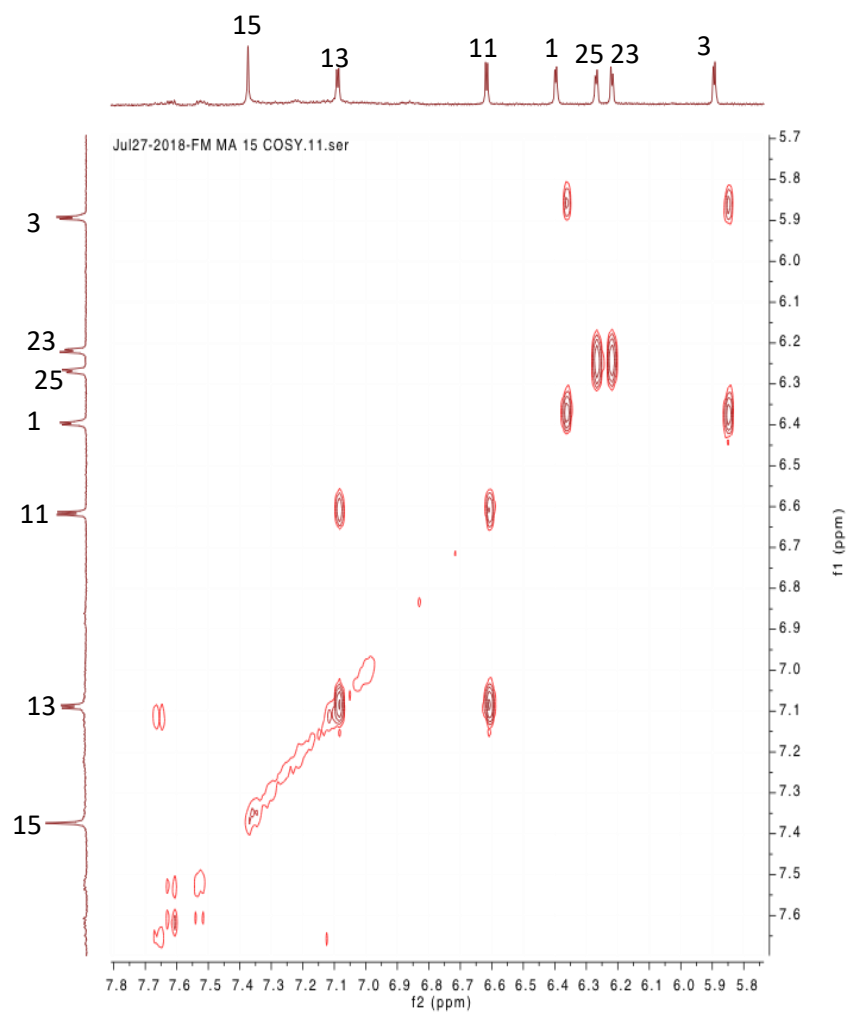

Figure S5. COSY spectrum of accramycin A in CD<sub>3</sub>OD at 600 MHz

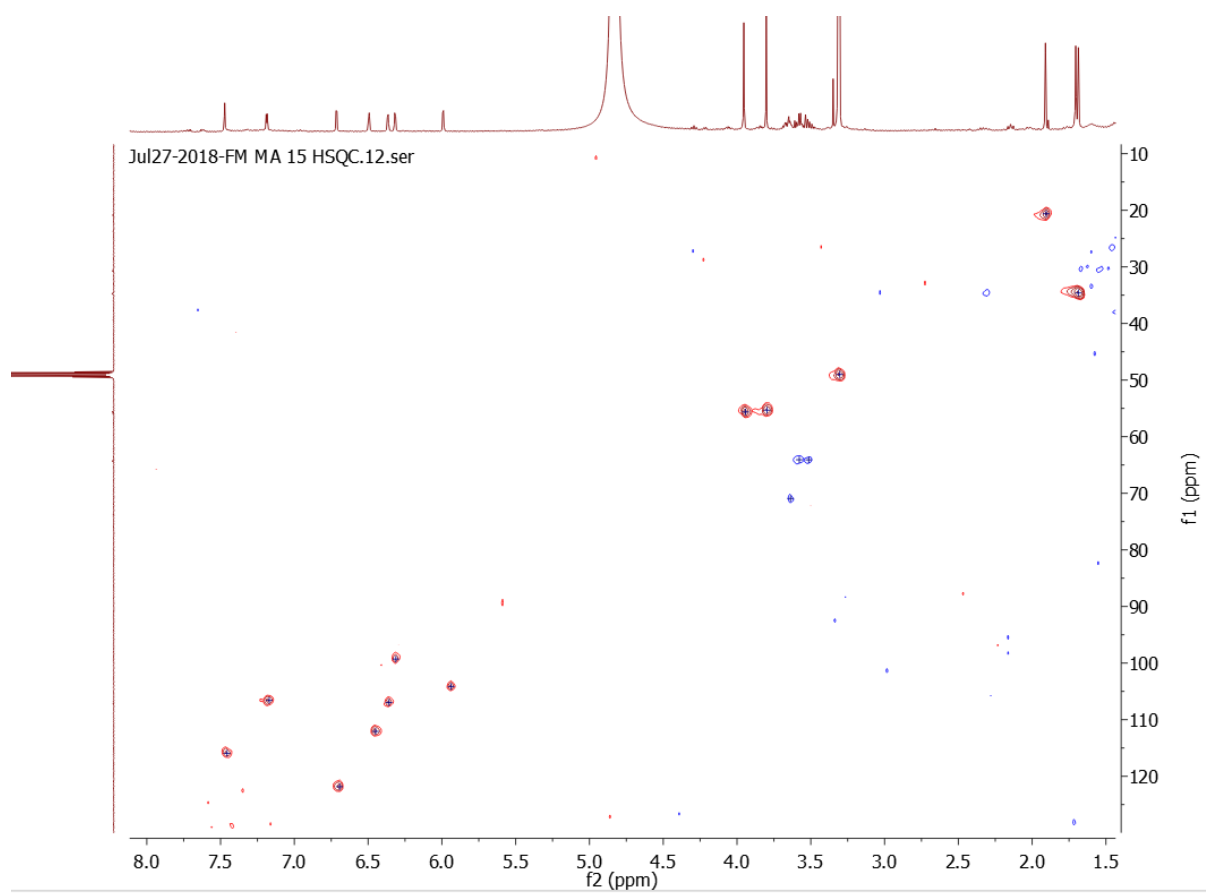

Figure S6. HSQC spectrum of accramycin A in CD<sub>3</sub>OD at 600 MHz

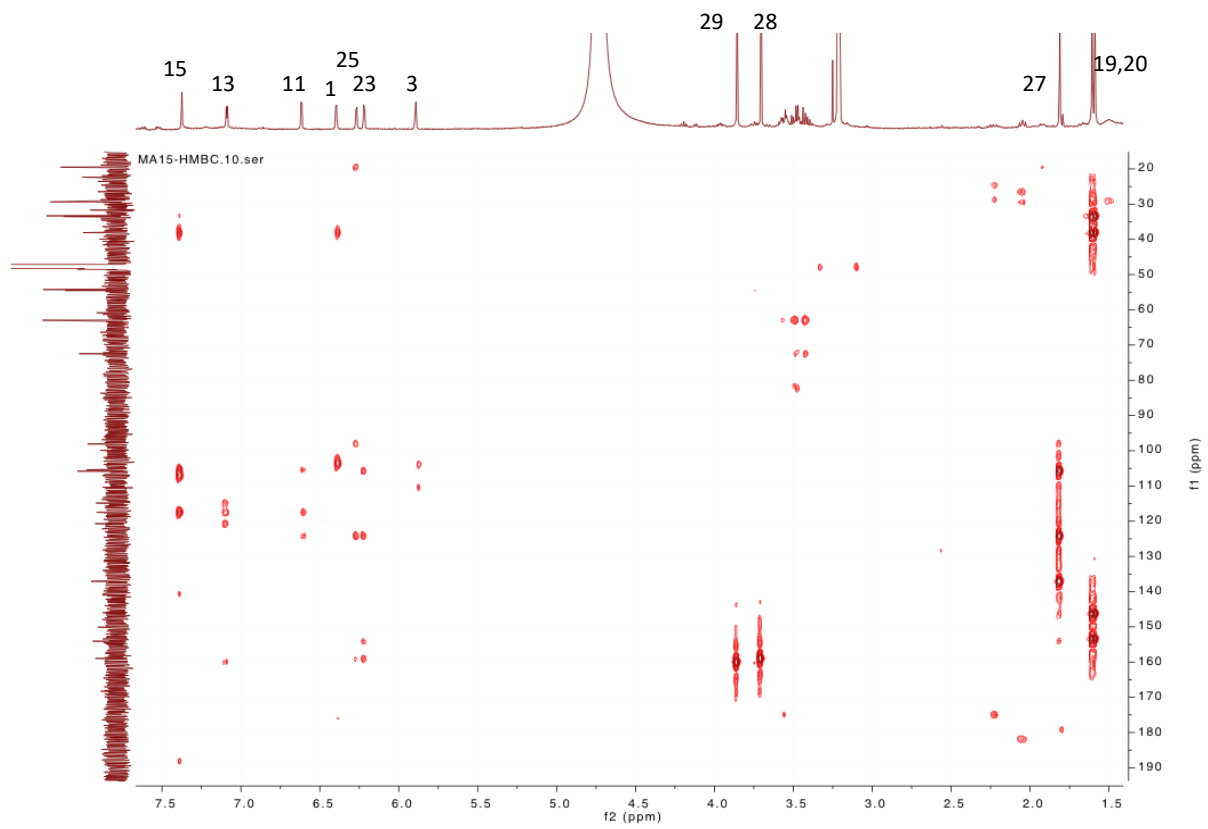

Figure S7. HMBC spectrum of accramycin A in CD<sub>3</sub>OD at 600 MHz

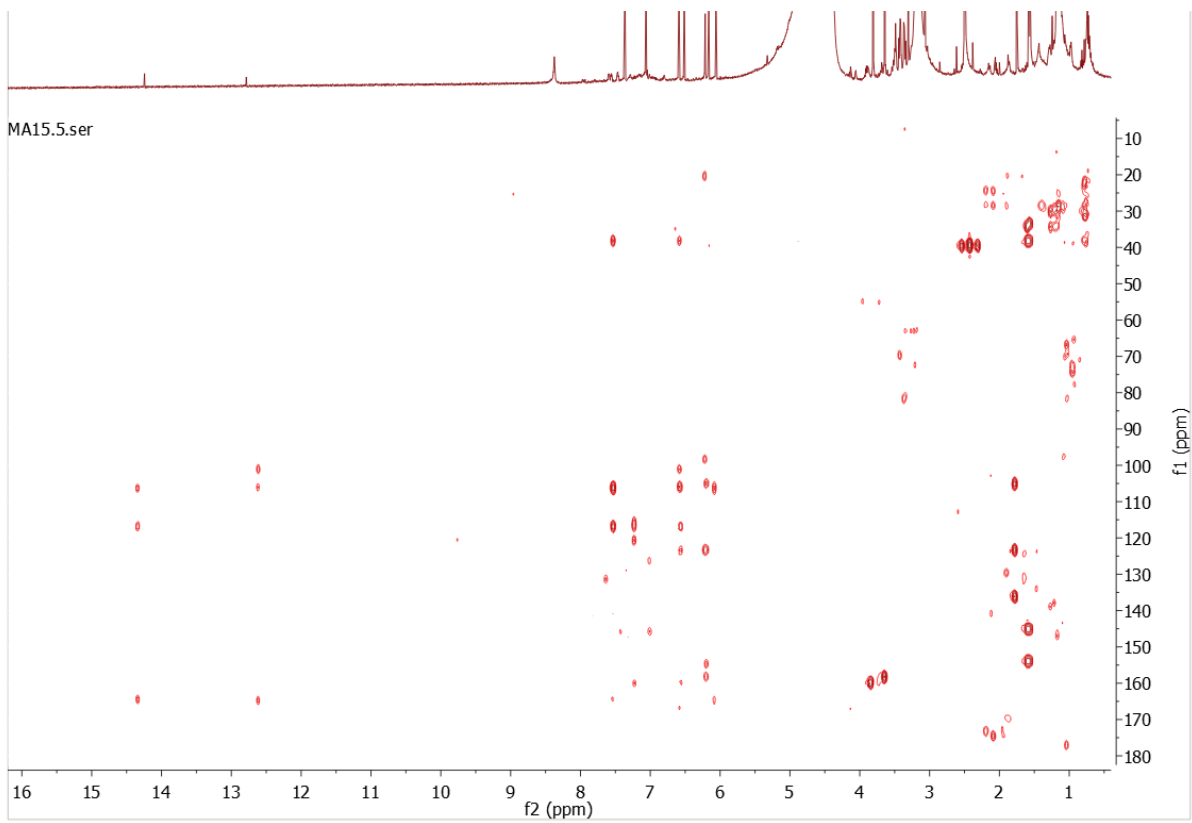

Figure S8. HMBC spectrum of accramycin A in DMSO- $d_6$  at 600 MHz

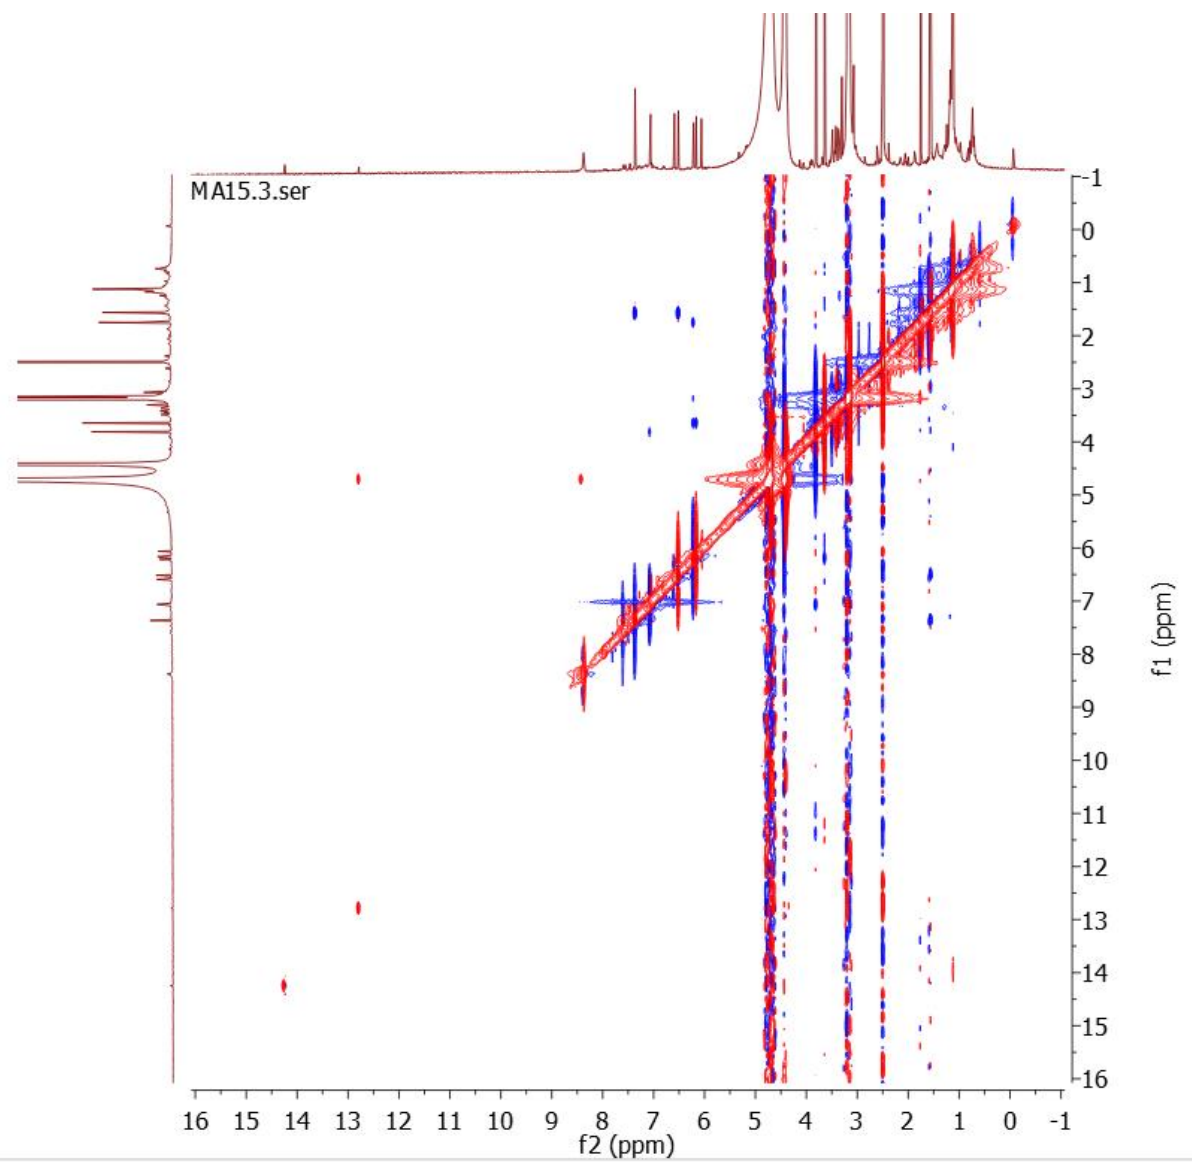

Figure S9. NOESY spectrum of accramycin A in DMSO-*d*<sub>6</sub> at 600 MHz



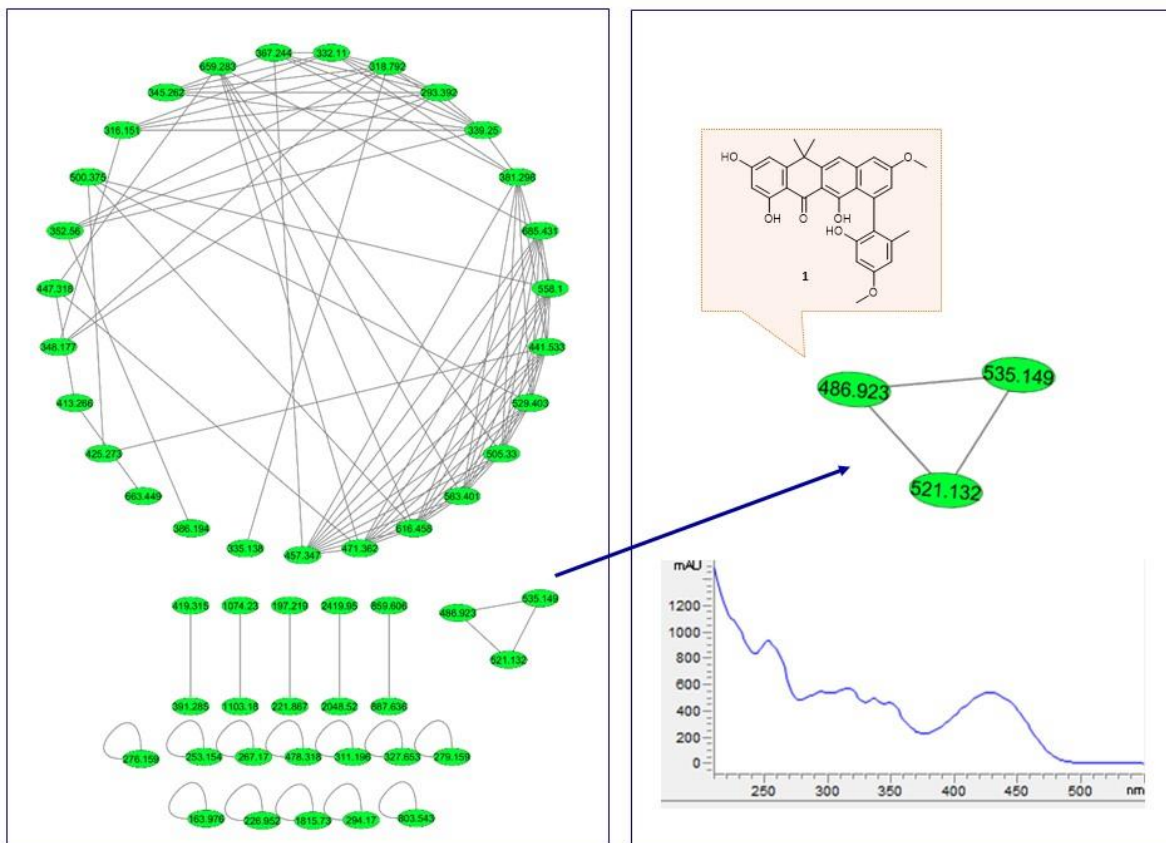

Figure S10. Accramycin cluster from the molecular network of MA37 extract and the corresponding UV spectra (200-550 nm)

RA3 #450 RT: 17.64 AV: 1 NL: 6.35E6  
F: FTMS + p ESI Full ms [100.00-2000.00]

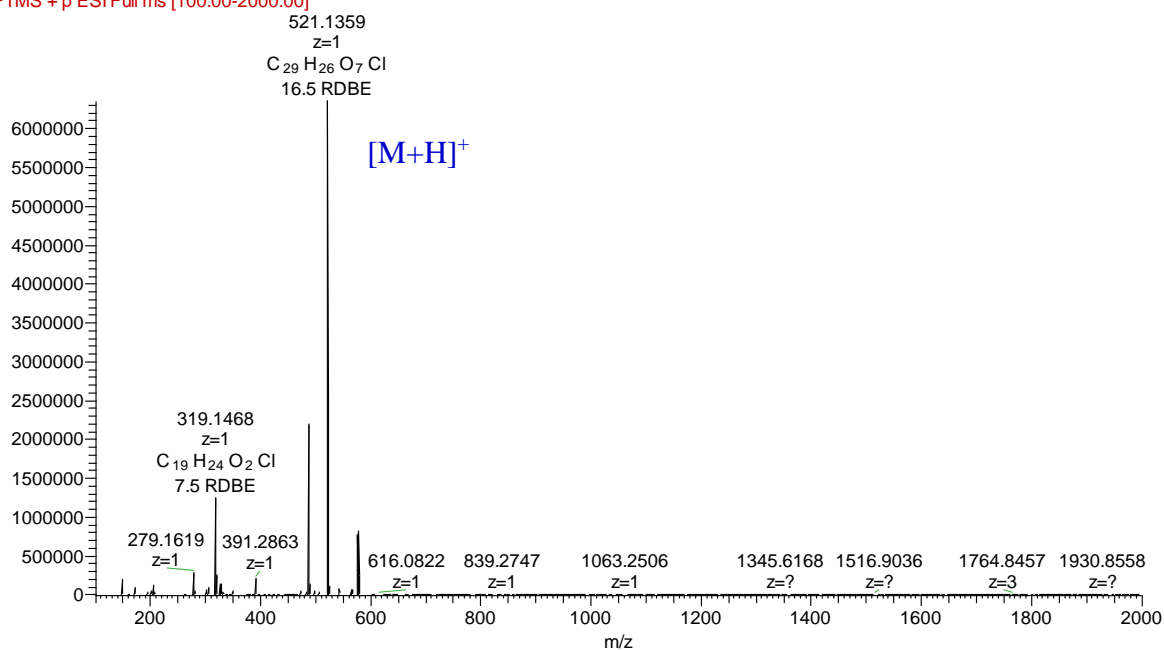

Figure S11. HR ESIMS of accramycin derivative 2

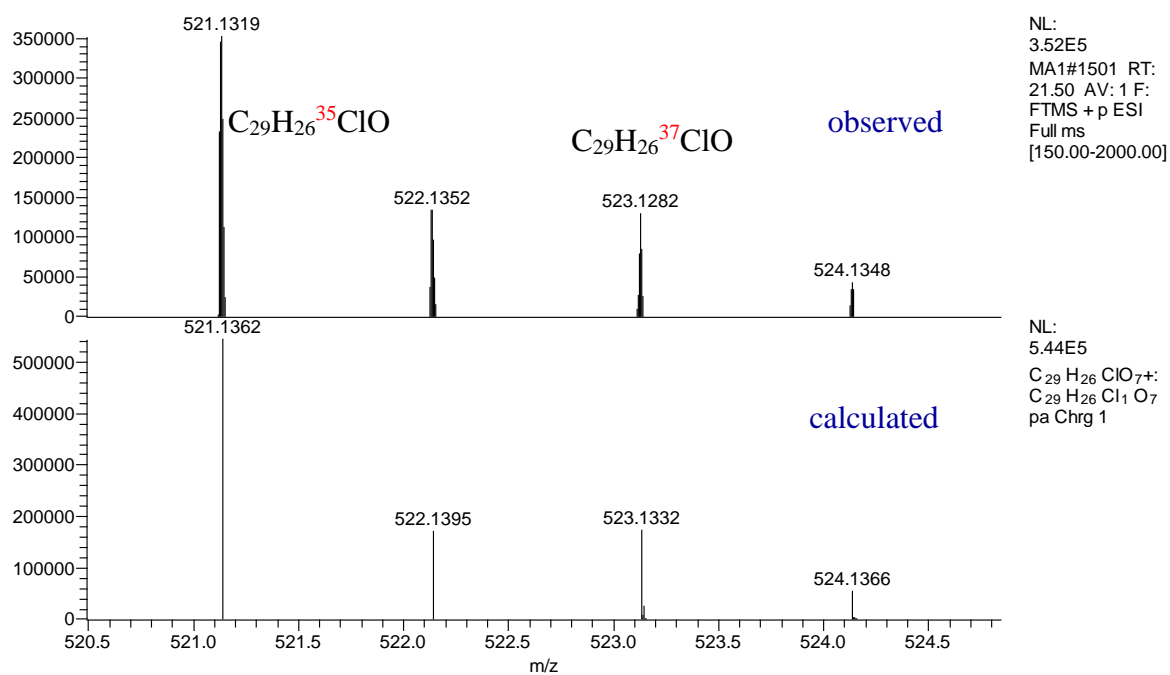

Figure S12. Isotope pattern of accramycin derivative 2

RA4 #522 RT: 19.69 AV: 1 NL: 1.67E6  
F: FTMS + p ESI Full ms [100.00-2000.00]

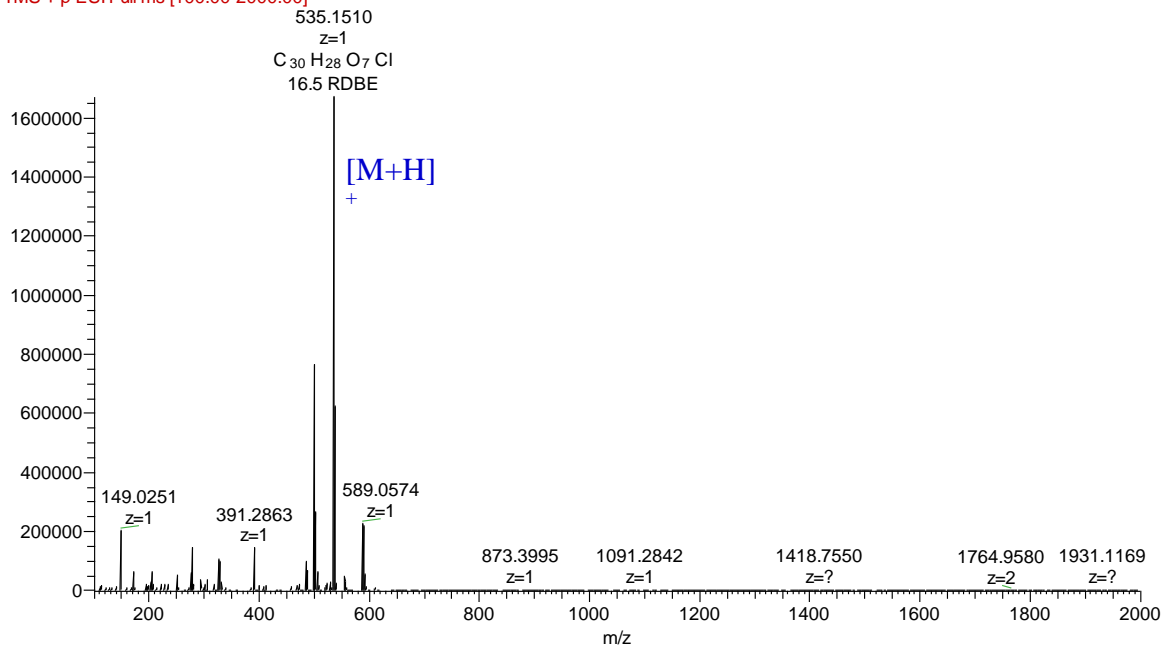

Figure S13. HR ESIMS of accramycin derivative 3

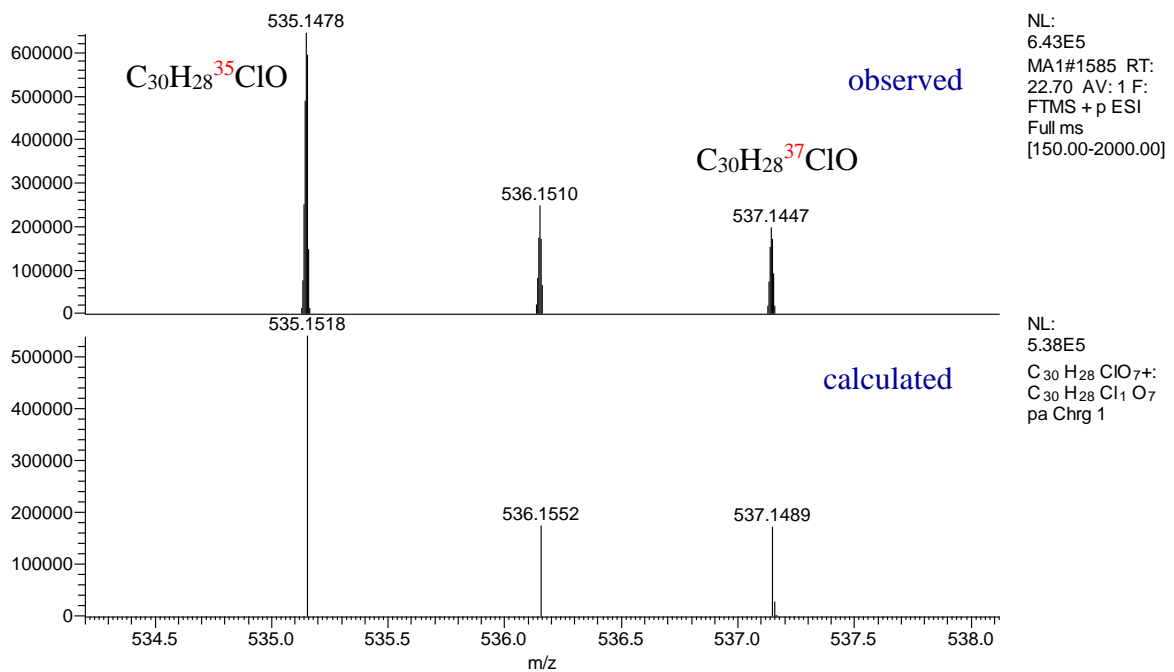

Figure S14. Isotope pattern of accramycin derivative 3

Table S1. Deduced functions of the ORFs in the *acc* biosynthetic gene cluster in *Streptomyces* sp. MA37. Highlighted in blue those that showed closest homology to the formicamycin (*for*) BGC in *Streptomyces formicae*.

|    | Gene         | AA  | Deduced Function                          | Closest similarity in database         | Identities / Positives |
|----|--------------|-----|-------------------------------------------|----------------------------------------|------------------------|
| 1  | <i>accE</i>  | 242 | DNA binding response regulator            | <i>Streptomyces albireticuli</i>       | 88% / 93%              |
| 2  | <i>orf1</i>  | 226 | Synthase                                  | <i>Streptomyces orinoci</i>            | 85% / 88%              |
| 3  | <i>orf2</i>  | 210 | Glycosyl transferase                      | <i>Streptomyces</i> sp. CB01635        | 74% / 78%              |
| 4  | <i>accM</i>  | 220 | SAM-dependent methyl transferase          | <i>Streptomyces</i> sp. TLI_146        | 75% / 81%              |
| 5  | <i>orf3</i>  | 60  | Hypothetical protein                      | <i>Streptomyces glaucescens</i>        | 71% / 80%              |
| 6  | <i>orf4</i>  | 38  | Unknown                                   |                                        |                        |
| 7  | <i>accN</i>  | 112 | Transcriptional regulator                 | <i>Streptomyces antibioticus</i>       | 93% / 95%              |
| 8  | <i>accO</i>  | 305 | NAD(P) dependent oxidoreductase           | <i>Streptomyces</i> sp. MUSC 93        | 87% / 92%              |
| 9  | <i>accP</i>  | 275 | MerR family transcriptional regulator     | <i>Kitasatospora mediocidica</i>       | 76% / 86%              |
| 10 | <i>orf5</i>  | 193 | Nucleoside phosphorylase                  | <i>Saccharothrix</i> sp. ST-888        | 68% / 83%              |
| 11 | <i>orf6</i>  | 146 | VOC family protein                        | <i>Streptomyces orinoci</i>            | 82% / 88%              |
| 12 | <i>orf7</i>  | 202 | Isomerase                                 | <i>Streptomyces globisporus</i>        | 68% / 78%              |
| 13 | <i>accI</i>  | 303 | LysR family transcriptional regulator     | <i>Streptomyces</i> sp. NEAU-D10       | 75% / 82%              |
| 14 | <i>orf8</i>  | 108 | Hypothetical protein                      | <i>Streptomyces</i> sp. TLI_146        | 79% / 87%              |
| 15 | <i>orf9</i>  | 140 | Hypothetical protein                      | <i>Streptomyces roseovorticillatus</i> | 60% / 65%              |
| 16 | <i>orf10</i> | 386 | Molybdopterine-binding protein            | <i>Streptomyces olivoreticuli</i>      | 82% / 88%              |
| 17 | <i>orf11</i> | 480 | Domain containing proteins                | <i>Streptomyces olivoreticuli</i>      | 76% / 81%              |
| 18 | <i>accH</i>  | 491 | ABC transporter                           | <i>Streptomyces</i> sp. MBT76          | 88% / 92%              |
| 19 | <i>accI</i>  | 319 | ABC transporter                           | <i>Streptomyces cinnamoneus</i>        | 86% / 90%              |
| 20 | <i>accL</i>  | 119 | Type II PKS cyclase                       | <i>Streptomyces</i>                    | 73% / 80%              |
| 21 | <i>accK</i>  | 509 | Na <sup>+</sup> /H <sup>+</sup> exchanger | <i>S. formicae</i>                     | 69% / 76%              |
| 22 | <i>accJ</i>  | 145 | MarR family transcriptional regulator     | <i>S. formicae</i>                     | 68% / 77%              |
| 23 | <i>accG</i>  | 359 | Sensor histidine kinase                   | <i>S. formicae</i>                     | 53% / 67%              |
| 24 | <i>accF</i>  | 227 | LuxR family response regulator            | <i>S. formicae</i>                     | 74% / 82%              |
| 25 | <i>accD</i>  | 152 | Polyketide cyclase / dehydrase            | <i>Streptomyces cyaneogriseus</i>      | 74% / 84%              |
| 26 | <i>accC</i>  | 97  | Acyl carrier protein                      | <i>S. formicae</i>                     | 56% / 66%              |
| 27 | <i>accB</i>  | 415 | Beta-ketoacyl synthase                    | <i>S. formicae</i>                     | 75% / 81%              |
| 28 | <i>accA</i>  | 426 | Beta-ketoacyl synthase                    | <i>S. formicae</i>                     | 79% / 86%              |
| 29 | <i>accR</i>  | 131 | cupin (cyclase / monooxygenase)           | <i>S. formicae</i>                     | 76% / 82%              |
| 30 | <i>accS</i>  | 113 | Antibiotic biosynthesis monooxygenase     | <i>S. formicae</i>                     | 66% / 73%              |
| 31 | <i>accT</i>  | 350 | O-methyl transferase                      | <i>S. formicae</i>                     | 76% / 83%              |
| 32 | <i>accU</i>  | 113 | Antibiotic biosynthesis monooxygenase     | <i>S. formicae</i>                     | 82% / 88%              |
| 33 | <i>accV</i>  | 430 | Halogenase                                | <i>S. formicae</i>                     | 68% / 78%              |
| 34 | <i>accW</i>  | 348 | O-methyl transferase                      | <i>S. formicae</i>                     | 50% / 60%              |
| 35 | <i>orf13</i> | 480 | Phenylalanine specific permease           | <i>Streptomyces luteovorticillatus</i> | 91% / 94%              |
| 36 | <i>accX</i>  | 777 | Hydrolase                                 | <i>Streptomyces albovorticillatus</i>  | 82% / 90%              |
| 37 | <i>orf14</i> | 43  | DUF-1232 domain containing protein        | <i>Deinococcus yavapaiensis</i>        | 44% / 48%              |
| 38 | <i>accY</i>  | 517 | Decarboxylase                             | <i>Streptomyces varsoviensis</i>       | 72% / 79%              |

*Streptomyces sp. MA37*

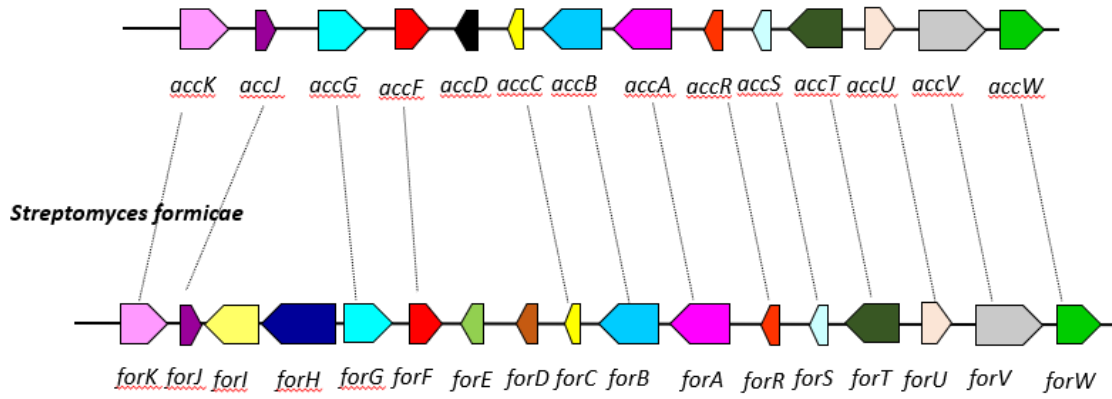

Figure S15. Comparison of the genes surrounding the *accV* halogenase gene of *Streptomyces sp. MA37* vs. *Streptomyces formicae*

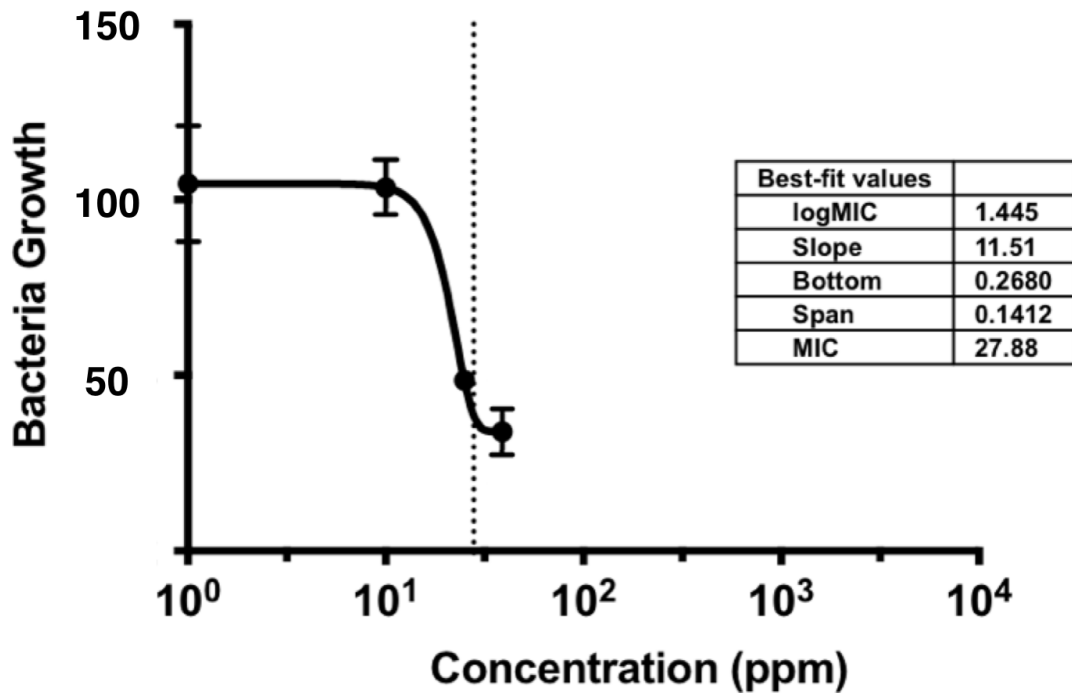

Figure S16. MIC curve of accramycin A against *Streptococcus B. ATCC 12386* using *Gompertz* model
